# Supplementary material for: Reovirus Nonstructural Protein σNS Recruits Viral RNA to Replication Organelles
Source: PubMed Central journal article supplement (PMC8406312; doi:10.1128/mbio.01408-21), 2021-07-06
Supplement: mbio.01408-21-sf001.pdf [file mbio.01408-21-sf001.pdf]

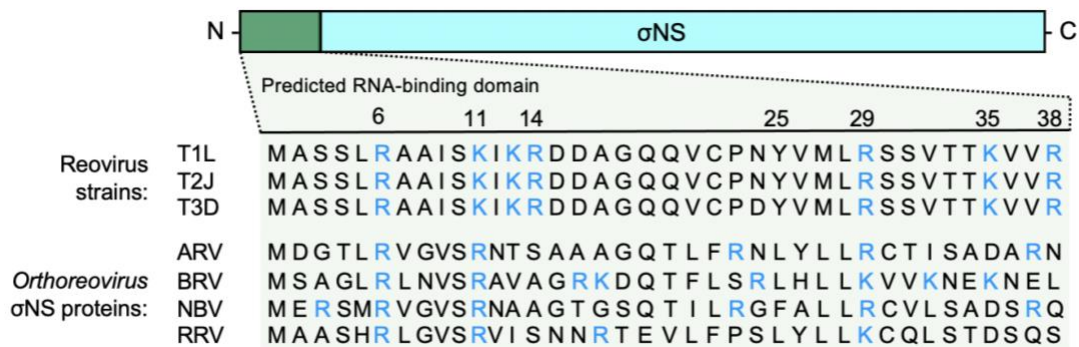

1

2 **FIG S1** Sequence alignment of the N-terminal 38 amino acids (green bar) of σNS

3 proteins encoded by *Orthoreovirus* species. Shown are σNS sequences from

4 mammalian reovirus strains T1L, T2J, and T3D, avian reovirus (ARV), baboon reovirus

5 (BRV), Nelson Bay orthoreovirus (NBV), and reptilian reovirus (RRV). Positively

6 charged residues are shown in blue.
