# Supplementary material for: Reovirus Nonstructural Protein σNS Recruits Viral RNA to Replication Organelles
Source: PubMed Central journal article supplement (PMC8406312; doi:10.1128/mbio.01408-21), 2021-07-06
Supplement: mbio.01408-21-sf002.pdf [file mbio.01408-21-sf002.pdf]

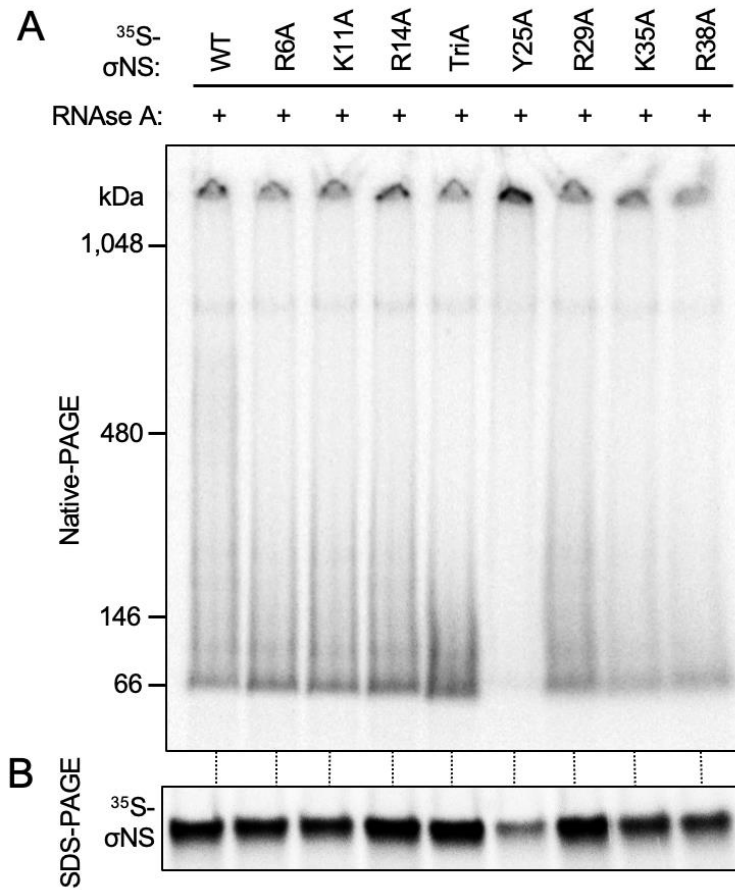

- 1 **FIG S2** RNase A treatment of  $\sigma$ NS mutants disrupt RNA-dependent oligomerization.
- 2 <sup>35</sup>S-labeled  $\sigma$ NS was expressed in RRLs and incubated with RNase A. Samples were
- 3 resolved by (A) native PAGE to preserve oligomeric species or (B) SDS-PAGE to
- 4 monitor protein expression and visualized by autoradiography.
