# Supplementary material for: Reovirus Nonstructural Protein σNS Recruits Viral RNA to Replication Organelles
Source: PubMed Central journal article supplement (PMC8406312; doi:10.1128/mbio.01408-21), 2021-07-06
Supplement: mbio.01408-21-sf003.pdf [file mbio.01408-21-sf003.pdf]

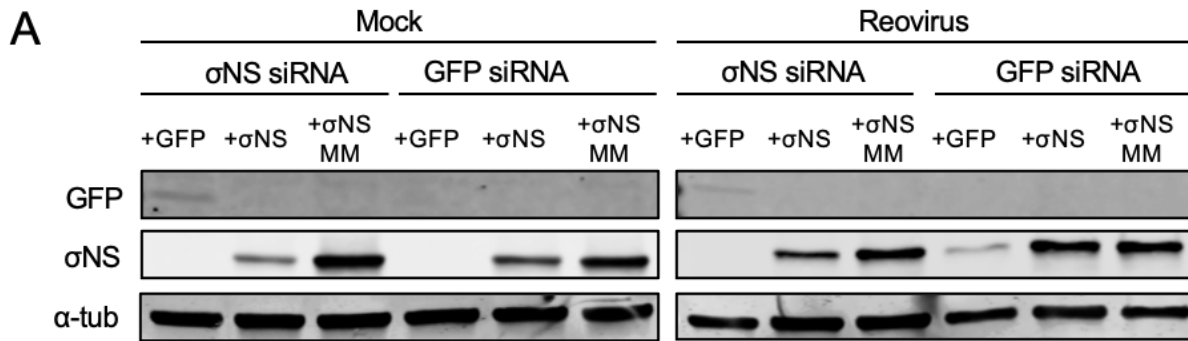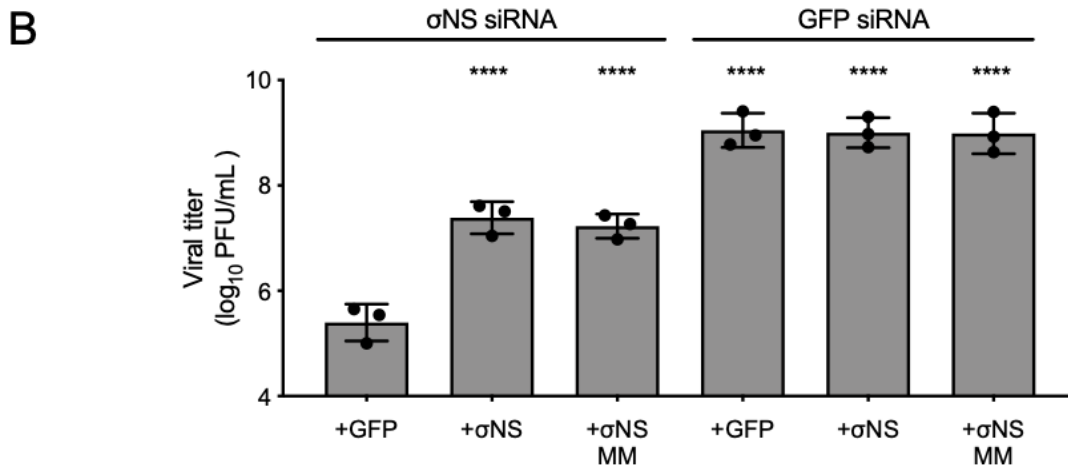

1  
 2 **FIG S3** Overexpression of  $\sigma$ NS complements siRNA knockdown of  $\sigma$ NS during  
 3 infection. Cells that constitutively express siRNAs directed against  $\sigma$ NS or GFP were  
 4 transfected with expression plasmids encoding GFP, WT  $\sigma$ NS ( $\sigma$ NS), or WT  $\sigma$ NS with  
 5  $\sigma$ NS-siRNA-resistant sequences ( $\sigma$ NS MM) and incubated for 24 h. Cells were  
 6 adsorbed with reovirus strain T3D at an MOI of 5 PFU/cell and incubated for 24 h. Cell  
 7 lysates were collected for (A) immunoblotting and (B) infectious virus quantification by  
 8 plaque assay. (A) Immunoblot analysis of proteins expressed following  
 9 complementation. Protein expression was evaluated using monoclonal antibodies  
 10 specific for GFP or alpha-tubulin ( $\alpha$ -tub) and guinea-pig sera specific for  $\sigma$ NS. (B)  
 11 Infectious virus quantification following complementation. Titer values that differ

12 significantly from those obtained from cells expressing siRNAs against  $\sigma$ NS  
13 complemented with GFP by one-way analysis of variance (ANOVA) with Dunnett's  
14 multiple-comparison test are shown (\*\*\*\*,  $P < 0.0001$ ).

15
