# Supplementary material for: Reovirus Nonstructural Protein σNS Recruits Viral RNA to Replication Organelles
Source: PubMed Central journal article supplement (PMC8406312; doi:10.1128/mbio.01408-21), 2021-07-06
Supplement: mbio.01408-21-sf004.pdf [file mbio.01408-21-sf004.pdf]

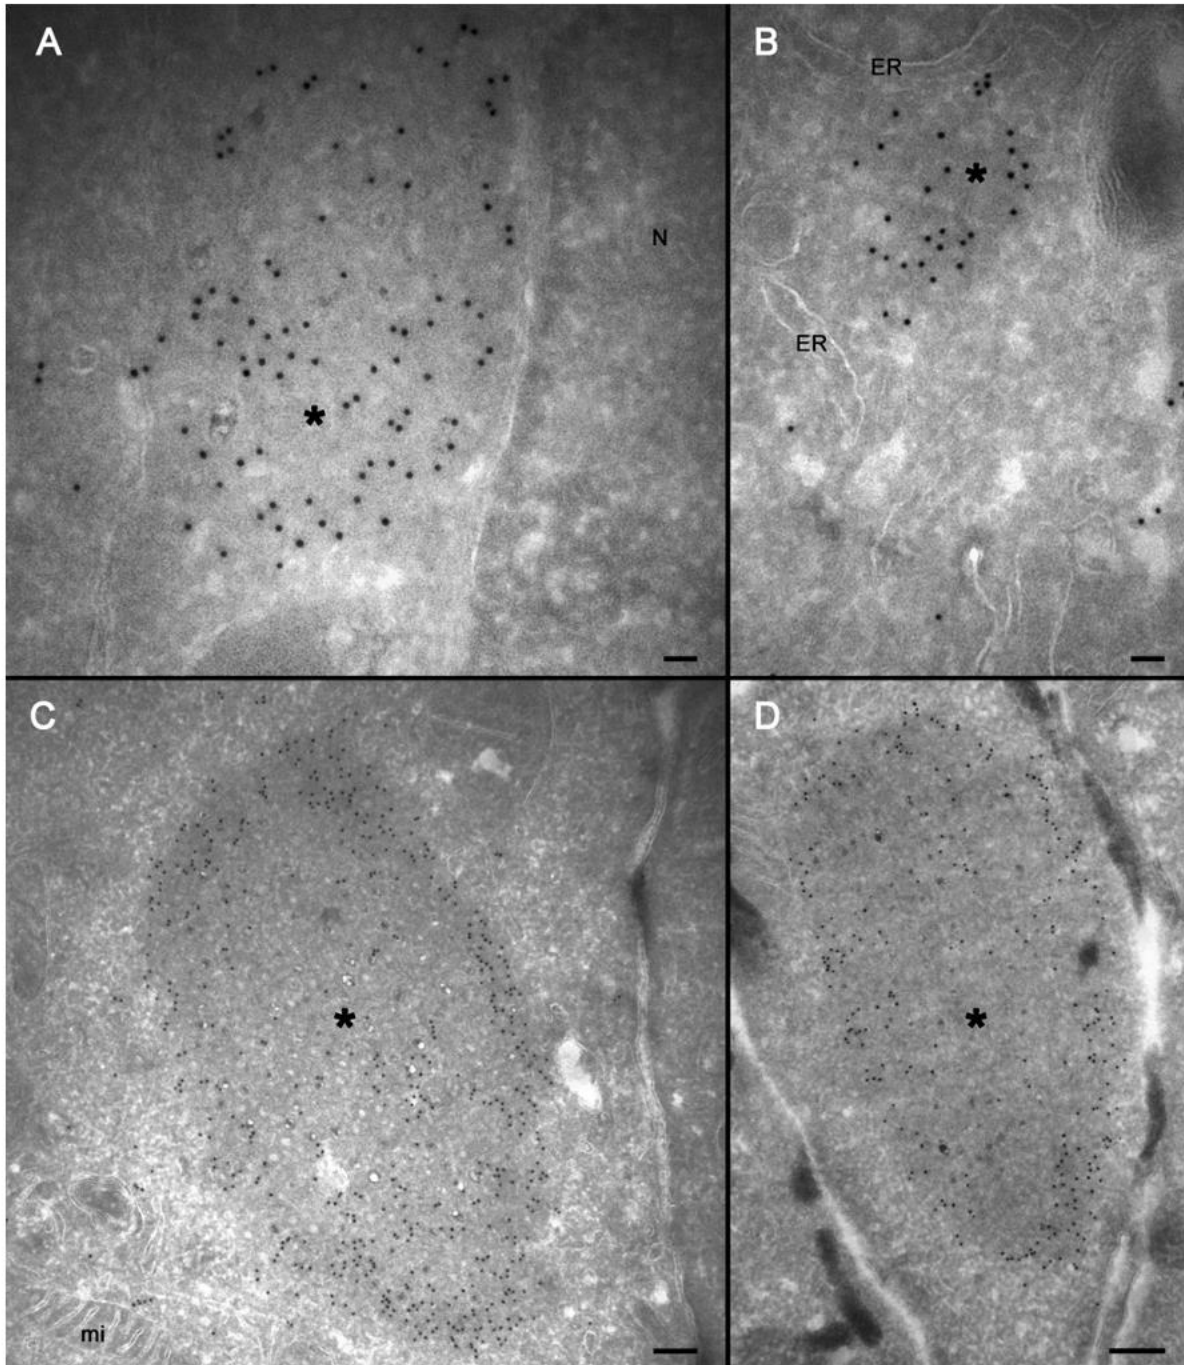

1

2 **FIG S4** Immunogold labeling of  $\sigma$ NS proteins in Tokuyasu cryosections of reovirus-  
3 infected cells. Cells were adsorbed with reovirus strain T1L M1 P208S at an MOI of 1  
4 PFU/cell, incubated for 14 h, frozen in liquid nitrogen, and sectioned at  $-120^{\circ}\text{C}$ . Thawed  
5 cryosections were processed for immunogold labeling using  $\sigma$ NS-specific monoclonal

6 antibody 2F5, followed by a secondary antibody bound to 10 nm colloidal gold spheres.  
7 Cryosections were imaged using transmission electron microscopy. Panels A and B  
8 show representative images of small, punctate, viral factories, and panels C and D  
9 show representative images of larger mature factories. Nucleus (N), endoplasmic  
10 reticulum (ER), and mitochondria (mi) are labeled when visible surrounding a viral  
11 factory (\*). Bars, 50 nm (A and B), 200 nm (C and D).  
12
