# Supplementary material for: Reovirus Nonstructural Protein σNS Recruits Viral RNA to Replication Organelles
Source: PubMed Central journal article supplement (PMC8406312; doi:10.1128/mbio.01408-21), 2021-07-06
Supplement: mbio.01408-21-sf005.pdf [file mbio.01408-21-sf005.pdf]

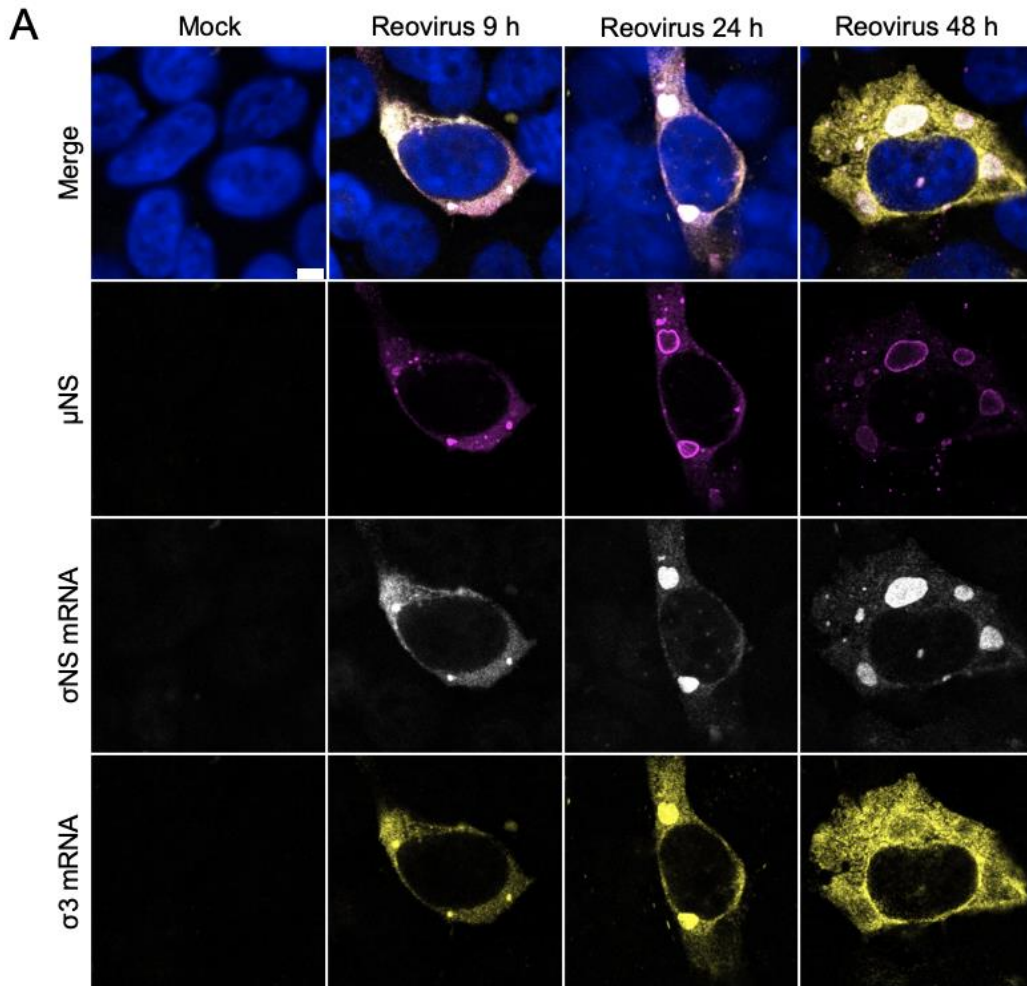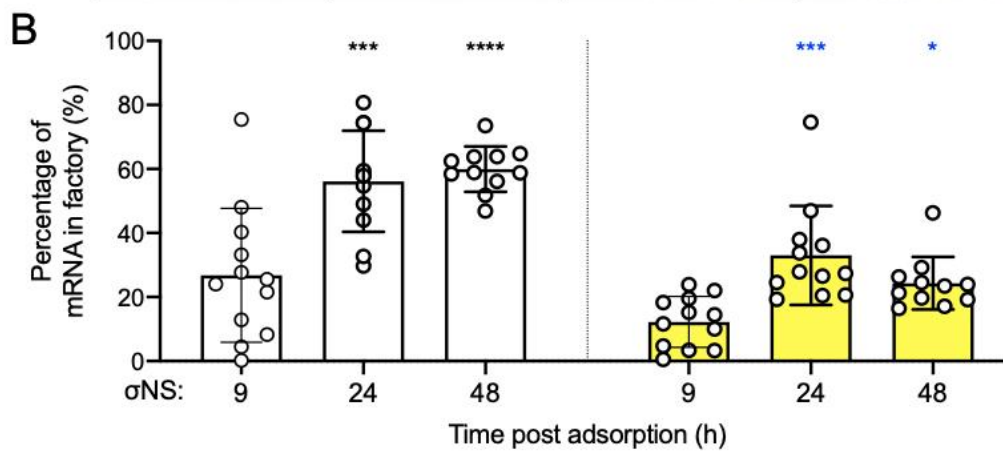

1

2 **FIG S5** Reovirus transcripts differentially localize in viral factories at late timepoints  
 3 post-adsorption. HEK293T cells were adsorbed with reovirus strain T3D at an MOI of 20  
 4 PFU/cell, incubated for 9, 24, and 48 h, fixed, stained using RNA FISH probes specific

5 for  $\sigma$ NS mRNA (white) or  $\sigma$ 3 mRNA (yellow),  $\mu$ NS-specific antiserum (magenta), and  
6 DAPI (blue), and imaged using confocal microscopy. Bar, 5  $\mu$ m. The percentage of  
7 cytoplasmic (B, white bars)  $\sigma$ NS-mRNA and (B, yellow bars)  $\sigma$ 3-mRNA FISH signals in  
8 reovirus factories was quantified by dividing the sum of FISH signal in reovirus factories  
9 by the sum of cytoplasmic FISH signal. Individual data points represent single cells.  
10 Percentage values that differ significantly from those obtained from 9 h post-adsorption  
11 by one-way analysis of variance (ANOVA) with Dunnett's multiple-comparison test are  
12 shown (\*,  $P < 0.0332$ ; \*\*\*,  $P < 0.0002$ ; \*\*\*\*,  $P < 0.0001$ ).

13
