# Supplementary material for: Reovirus Nonstructural Protein σNS Recruits Viral RNA to Replication Organelles
Source: PubMed Central journal article supplement (PMC8406312; doi:10.1128/mbio.01408-21), 2021-07-06
Supplement: mbio.01408-21-st001.pdf [file mbio.01408-21-st001.pdf]

1 Supplemental Table 1

|                               | Sequence (5'→3')                                           |                                                             |
|-------------------------------|------------------------------------------------------------|-------------------------------------------------------------|
|                               | Forward (F)                                                | Reverse (R)                                                 |
| T3D M3<br>5'-KpnI-<br>NotI-3' | CGACGGTACCATGGCTTCATTCA<br>AGGGATTCTCCG                    | ATCACAGGCGGCCGCTTACAACATCAT<br>CAGTTGGAACAGAGAAATC          |
| T3D S3<br>R6A                 | CTTGGAGATCGCAGCTGCGA<br>GTGAGGAAGCCATG                     | CATGGCTTCCTCACTCGCAGCTGC<br>GATCTCCAAG                      |
| T3D S3<br>K11A                | CGTCATCCCTCTTGATCGCGG<br>AGATCGCAGCTCTGA                   | TCAGAGCTGCGATCTCCGCGATCA<br>AGAGGGATGACG                    |
| T3D S3<br>R14A                | GCTGACCGACGTCATCCGCC<br>TTGATCTTGGAGATCG                   | CGATCTCCAAGATCAAGGCGGATG<br>ACGTCGGTCAGC                    |
| T3D S3<br>TriA                | CACTCAGAGCTGCGATCTCCG<br>CGATCGCGGGGATGACGTC<br>GGTCAGCAAG | CTTGCTGACCGACGTCATCCGCCG<br>CGATCGCGGAGATCGCAGCTCTGA<br>GTG |
| T3D S3<br>Y25A                | CGTCGGTCAGCAAGTTTGTCC<br>TAATGCTGTCATGCTGCGG               | CCGCAGCATGACAGCATTAGGACA<br>AACTTGCTGACCGACG                |
| T3D S3<br>R29A                | CTTTGTTGTGACAGAGGACGC<br>CAGCATGACATAATTAGGA               | TCCTAATTATGTCATGCTGGCGTCC<br>TCTGTCACAACAAAG                |
| T3D S3<br>K35A                | ACATTTTCGTACCACCGCTGTT<br>GTGACAGAGGACCGCAG                | CTGCGGTCCTCTGTCAACAACAGCG<br>GTGGTACGAAATGT                 |
| T3D S3<br>R38A                | AATTTGATACTCAACCACATTT<br>GCTACCACCTTTGTTGTGACA<br>GAG     | CTCTGTCACAACAAGGTGGTAGC<br>AAATGTGGTTGAGTATCAAATT           |
